# Supplementary material for: Ultra-dehydration of a reactive epichlorohydrin-containing organic mixture using a defect-free thin carbon molecular sieve composite membrane
Source: Royal Society of Chemistry journal article supplement (doi:10.1039/d0ma00899k), 2021-01-01
Supplement: d0ma00899k1.pdf [file d0ma00899k1.pdf]

**Ultra-dehydration of reactive epichlorohydrin-containing organic mixture using a defect-free thin carbon molecular sieve composite membrane**

Seong-Joong Kim<sup>a,1</sup>, YongSung Kwon<sup>a,b,1</sup>, DaeHun Kim<sup>a</sup>, Hosik Park<sup>a</sup>, Young Hoon Cho<sup>a</sup>,  
Seung-Eun Nam<sup>a\*</sup>, You-In Park<sup>a\*</sup>

<sup>a</sup> Green Carbon Research Center, Korea Research Institute of Chemical Technology (KRICT), Gajeong-ro 141, Daejeon 34114, Korea

<sup>b</sup> Department of Chemical and Biomolecular Engineering, Korea Advanced Institute of Science and Technology (KAIST), Daejeon, 34141, South Korea

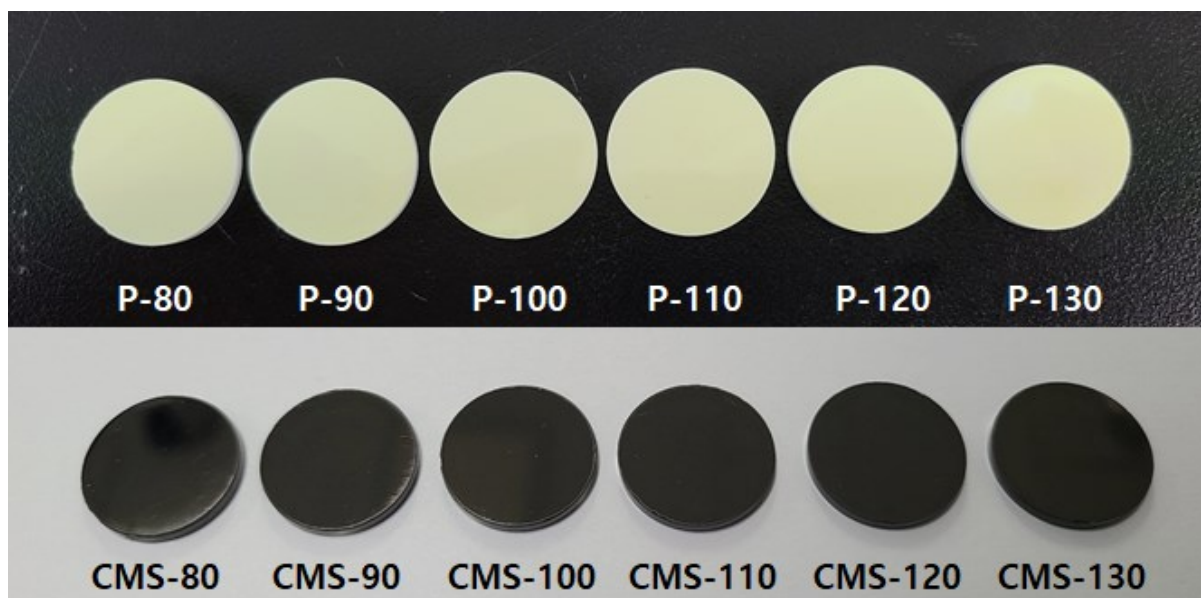

**S1** Images of polymeric (upper) and CMS (bottom) composite membranes deposited on alumina discs. The number represents the drop-amount ( $\mu\text{L}$ ) of polymer solution. P and CMS are abbreviations for polymer and CMS, respectively

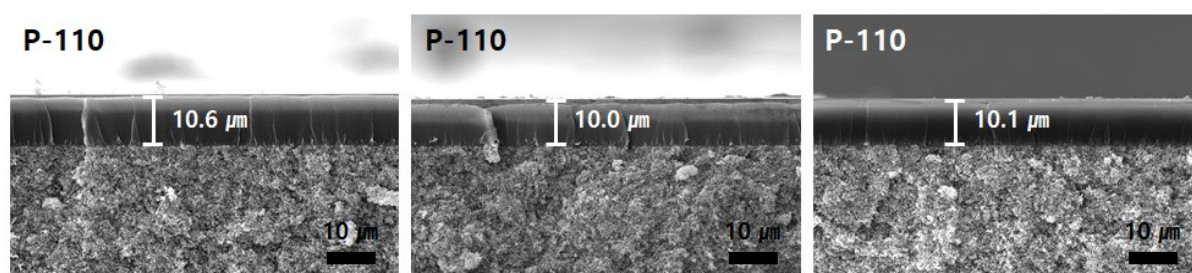

**S2** SEM images of the polymer layer coated on alumina disc with the polymer solution of 110  $\mu\text{L}$  (standard deviation:  $\pm 0.26 \mu\text{m}$ )

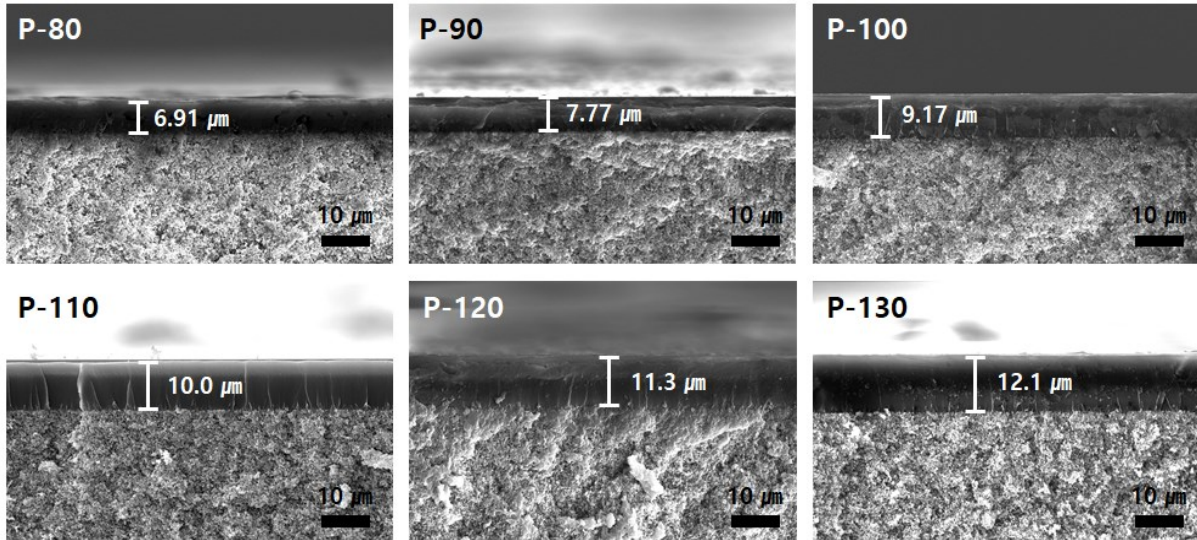

**S3** SEM images and layer thickness of Matrimid polymer composite membranes deposited on alumina discs using various drop-amounts of polymer solution

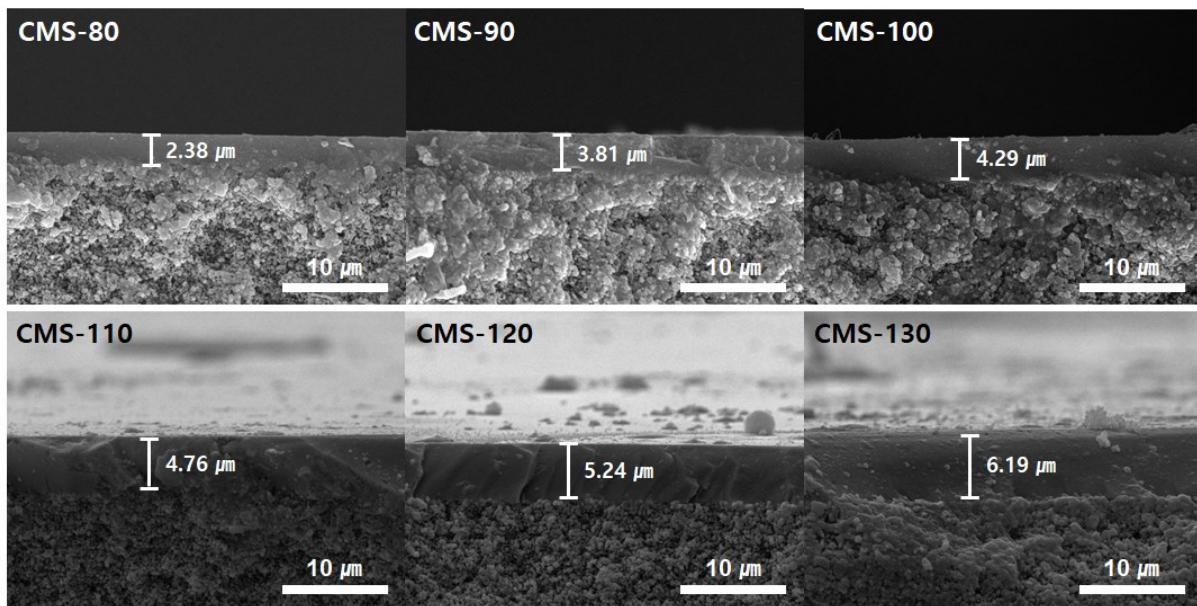

**S4** SEM images and layer thickness of CMS composite membranes deposited on alumina discs using various drop-amounts of polymer solution

**S5** Gas separation performance of the Matrimid polymer composite membranes deposited with various drop-amounts of polymer solution

|                     |                                 | Drop amount ( $\mu\text{L}$ ) |      |      |      |      |      |
|---------------------|---------------------------------|-------------------------------|------|------|------|------|------|
|                     |                                 | 80                            | 90   | 100  | 110  | 120  | 130  |
| Gas permeance (GPU) | H <sub>2</sub>                  | 4.95                          | 3.65 | 2.48 | 2.15 | 1.90 | 1.74 |
|                     | CO <sub>2</sub>                 | 1.34                          | 0.92 | 0.61 | 0.52 | 0.46 | 0.41 |
| Ideal selectivity   | H <sub>2</sub> /CO <sub>2</sub> | 3.69                          | 3.97 | 4.06 | 4.13 | 4.13 | 4.23 |

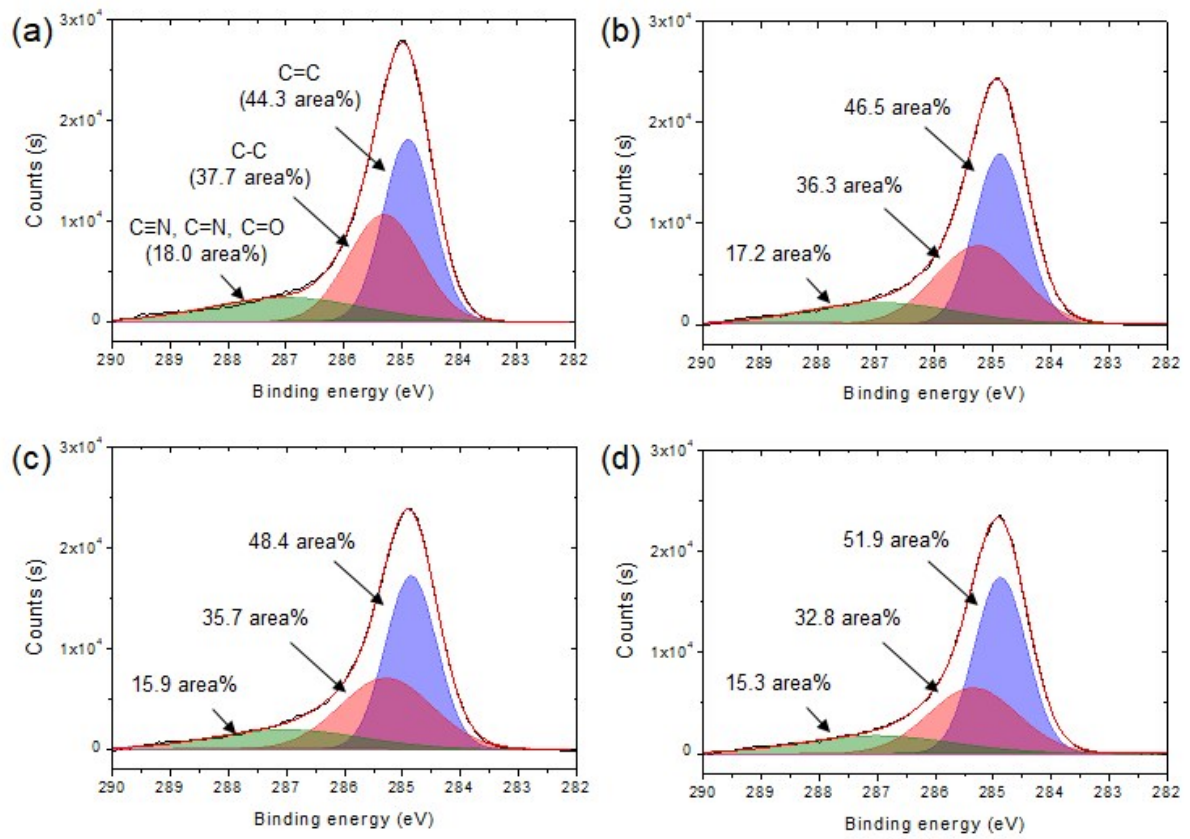

S6 C1s XPS spectra of CMS composite membranes carbonized at temperature of (a) 650, (b) 700, (c) 750, and (d) 800 °C

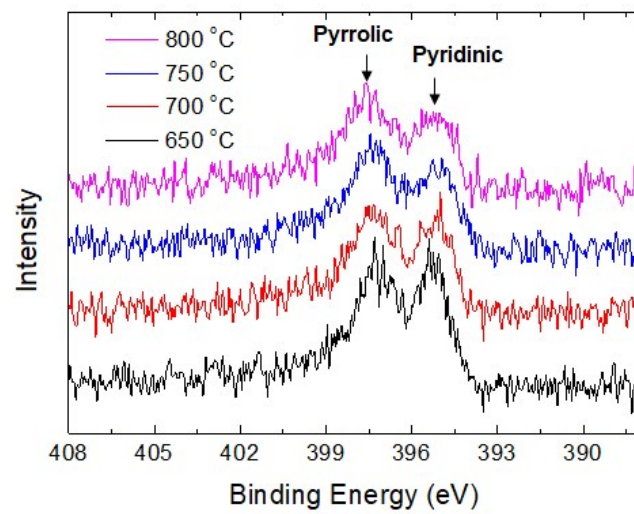

S7 N1s XPS spectra of CMS composite membranes carbonized at temperature of 650–800 °C

The gas separation performance of the CMS membranes studied in this work surpassed the Robeson upper bound trade-off relationship, as shown in S8–11. In particular,  $H_2$  and  $CO_2$  selectivity against  $N_2$  was placed near the highest position. Moreover, these are the most selective performances when compared with other CMS membranes reported in the literature, even though the gas permeance in this work was slightly lower than in those studies. In particular, our CMS membrane showed higher  $H_2/CO_2$  selectivity than other Matrimid-based CMS membrane reported in the literature. This is attributed to the formation of a defect-free pore structure from using the drop-coating process with a carbon layer of moderate thickness.

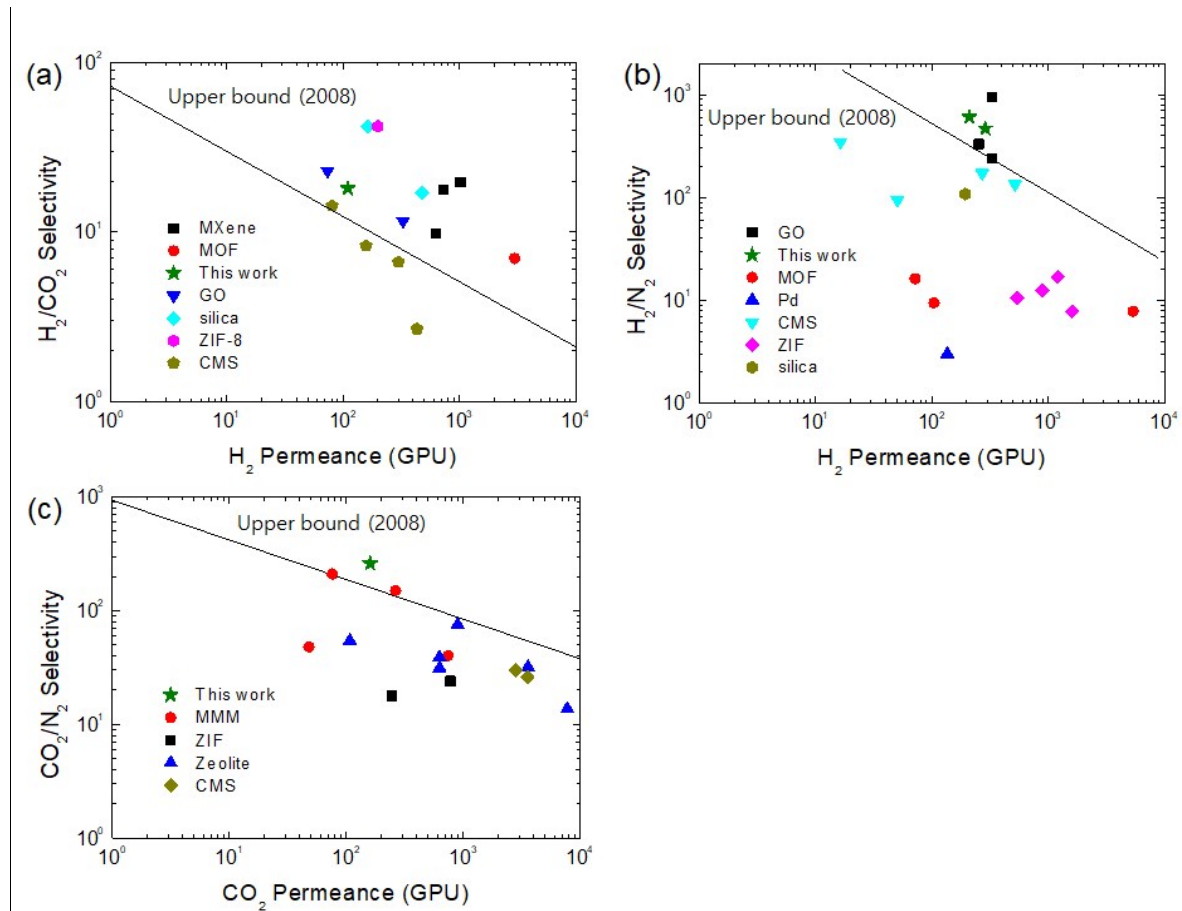

**S8** Comparison of gas separation performance of the CMS membranes studied in this work and of other membranes reported in the literature for: (a)  $H_2/CO_2$ , (b)  $H_2/N_2$ , and (c)  $CO_2/N_2$  separation

**S9** H<sub>2</sub> permeance and H<sub>2</sub>/CO<sub>2</sub> selectivity of various membranes reported in other literature

| Materials   | Operating tem. (°C) | H <sub>2</sub> permeance (GPU) | H <sub>2</sub> /CO <sub>2</sub> selectivity | Ref.  |           |
|-------------|---------------------|--------------------------------|---------------------------------------------|-------|-----------|
|             | 25                  | 733.4                          | 17.8                                        | 1     |           |
| Mxene       | 25                  | 1030.6                         | 19.7                                        | 1     |           |
|             | 25                  | 628.7                          | 9.8                                         | 1     |           |
| MOF         | 25                  | 2985                           | 7                                           | 2     |           |
| GO          | RT                  | 328                            | 11.63                                       | 3     |           |
|             | RT                  | 73.42                          | 22.93                                       | 3     |           |
| silica      | 20                  | 477.6                          | 17                                          | 4     |           |
| ZIF-8       | 25                  | 200                            | 42                                          | 5     |           |
| MFI zeolite | 25                  | 164                            | 42.2                                        | 6     |           |
| Matrimid    | 50                  | 298.5                          | 6.67                                        | 7     |           |
| PF resin    | 20                  | 5.1                            | 9.7                                         | 8     |           |
| CMS         | Phenol resin        | 27                             | 80.56                                       | 14.28 | 9         |
|             | PEI                 | 25                             | 158.2                                       | 8.3   | 10        |
|             | PEI                 | 25                             | 432.8                                       | 2.7   | 11        |
|             | Matrimid            | 25                             | 109                                         | 18.1  | This work |

**S10** H<sub>2</sub> permeance and H<sub>2</sub>/N<sub>2</sub> selectivity of various membranes reported in other literature

| Materials | Operating tem. (°C) | H <sub>2</sub> permeance (GPU) | H <sub>2</sub> /N <sub>2</sub> selectivity | Ref. |           |
|-----------|---------------------|--------------------------------|--------------------------------------------|------|-----------|
|           | 25                  | 104.3                          | 9.4                                        | 12   |           |
| MOF       | 25                  | 71.9                           | 16.2                                       | 12   |           |
|           | 25                  | 5373                           | 7.8                                        | 13   |           |
| GO        | 20                  | 328                            | 240                                        | 14   |           |
|           | 20                  | 328                            | 940                                        | 14   |           |
|           | 20                  | 253                            | 330                                        | 14   |           |
| silica    | 50                  | 194                            | 108                                        | 15   |           |
| ZIF-8     | 25                  | 537                            | 10.58                                      | 16   |           |
| ZIF-7     | 25                  | 1614                           | 7.84                                       | 16   |           |
|           | 25                  | 1211                           | 16.9                                       | 16   |           |
|           | 25                  | 895                            | 12.5                                       | 16   |           |
| Pd        | 35                  | 136                            | 3                                          | 17   |           |
| CMS       | PEI+PPO             | 25                             | 519                                        | 134  | 18        |
|           | PI+PPO              | 25                             | 271                                        | 172  | 18        |
|           | PFA                 | RT                             | 50.74                                      | 94   | 19        |
|           | PFA                 | 25                             | 16.4                                       | 347  | 20        |
|           | Matrimid            | 25                             | 288                                        | 468  | This work |
|           | Matrimid            | 25                             | 210                                        | 605  |           |

**S11** CO<sub>2</sub> permeance and CO<sub>2</sub>/N<sub>2</sub> selectivity of various membranes reported in other literature

| Materials                          | Operating tem. (°C) | CO <sub>2</sub> permeance (GPU) | CO <sub>2</sub> /N <sub>2</sub> selectivity | Ref.      |
|------------------------------------|---------------------|---------------------------------|---------------------------------------------|-----------|
| GO-MMM                             | 24                  | 76                              | 210                                         | 21        |
|                                    | 24                  | 48                              | 48                                          | 21        |
| GO-CNT-MMM                         | 25                  | 264                             | 149.8                                       | 22        |
| Co-ZIF                             | RT                  | 244.9                           | 17.8                                        | 23        |
| ZIF-8                              | 25                  | 776                             | 24                                          | 24        |
| MWCNT-MMM                          | RT                  | 741.67                          | 40.17                                       | 25        |
|                                    | 22                  | 3582                            | 32                                          | 26        |
| zeolite                            | 22                  | 626                             | 39                                          | 27        |
|                                    | 25                  | 107                             | 54.3                                        | 28        |
|                                    | 27                  | 7761                            | 13.7                                        | 29        |
|                                    | RT                  | 626                             | 31.2                                        | 30        |
|                                    | 30                  | 895                             | 75                                          | 31        |
| CMS<br>6FDA/BPDA-DAM +<br>Matrimid | 35                  | 2800                            | 30                                          | 32        |
|                                    | 35                  | 3522                            | 26                                          | 32        |
|                                    | 25                  | 160                             | 259                                         | This work |

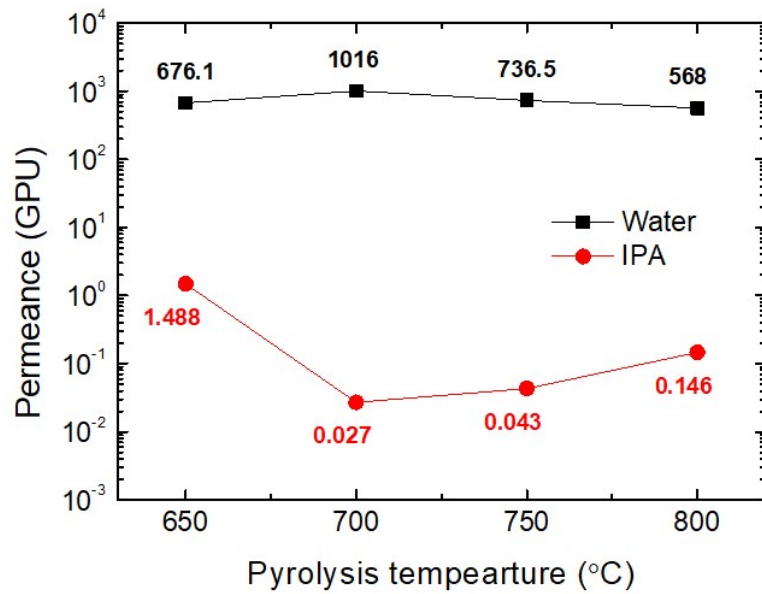

**S12** Water and IPA permeance of CMS composite membranes carbonized at temperatures of 650–800 °C for dehydration of a water/IPA binary mixture



**S13** Water/IPA flux, purity, and separation factor of CMS composite membranes carbonized at temperatures of 650–800 °C for dehydration of a water/IPA binary mixture with various content (at the feed temperature of 60 °C)

| Pyrolysis tem. (°C) | Feed con.wt%<br>H <sub>2</sub> O | Feed tem. (°C) | IPA Flux (kg/m <sup>2</sup> .hr) | Water Flux (kg/m <sup>2</sup> .hr) | S.F.   | IPA Purity (%) | Water Purity (%) |
|---------------------|----------------------------------|----------------|----------------------------------|------------------------------------|--------|----------------|------------------|
| 650                 | 5                                | 60             | 0.0025360                        | 0.3956465                          | 3494   | 0.54087        | 99.45913         |
|                     | 10                               | 60             | 0.0026647                        | 0.6130840                          | 2147   | 0.41743        | 99.58257         |
|                     | 15                               | 60             | 0.0023206                        | 0.6513416                          | 1841   | 0.30694        | 99.69306         |
|                     | 20                               | 60             | 0.0026143                        | 1.0715845                          | 1640   | 0.24337        | 99.75663         |
| 700                 | 5                                | 60             | 0.0000627                        | 0.6449372                          | 195253 | 0.00973        | 99.99027         |
|                     | 10                               | 60             | 0.0000509                        | 1.0709490                          | 189066 | 0.00476        | 99.99524         |
|                     | 15                               | 60             | 0.0000440                        | 1.2612345                          | 162363 | 0.00349        | 99.99651         |
|                     | 20                               | 60             | 0.0000480                        | 1.7849519                          | 148695 | 0.00269        | 99.99731         |
| 750                 | 5                                | 60             | 0.0002065                        | 0.4987935                          | 98172  | 0.01935        | 99.98065         |
|                     | 10                               | 60             | 0.0003883                        | 0.8686117                          | 81439  | 0.01105        | 99.98895         |
|                     | 15                               | 60             | 0.0002954                        | 0.9672708                          | 86641  | 0.00654        | 99.99346         |
|                     | 20                               | 60             | 0.0000752                        | 1.2936773                          | 76042  | 0.00526        | 99.99474         |
| 800                 | 5                                | 60             | 0.0002327                        | 0.3647672                          | 39156  | 0.04850        | 99.95150         |
|                     | 10                               | 60             | 0.0002917                        | 0.5977082                          | 32202  | 0.02794        | 99.97206         |
|                     | 15                               | 60             | 0.0002357                        | 0.6827553                          | 28117  | 0.02015        | 99.97985         |
|                     | 20                               | 60             | 0.0002567                        | 0.9977433                          | 21525  | 0.01858        | 99.98142         |

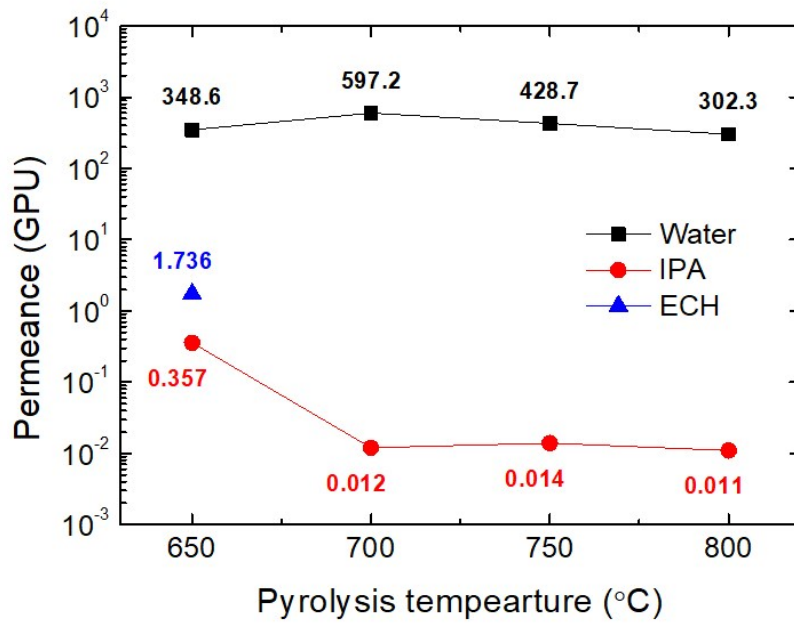

**S14** Water, IPA, and ECH permeance of CMS composite membranes carbonized at temperatures of 650–800 °C for dehydration of a water/IPA/ECH ternary mixture

**S15** Water/IPA/ECH flux, purity and separation factor of CMS composite membranes carbonized at temperature of 650–800 °C with various feed content and temperature for dehydration of a water/IPA/ECH ternary mixture

| Pyrolysis tem. (°C) | Feed con.% H <sub>2</sub> O | Feed temp. (°C) | IPA flux (kg/m <sup>2</sup> .hr) | ECH flux (kg/m <sup>2</sup> .hr) | Water flux (kg/m <sup>2</sup> .hr) | S.F.   | IPA Purity (%) | ECH Purity (%) | Water Purity (%) |
|---------------------|-----------------------------|-----------------|----------------------------------|----------------------------------|------------------------------------|--------|----------------|----------------|------------------|
| 650                 | 5                           | 60              | 0.0001882                        | 0.0009172                        | 0.1838945                          | 3161   | 0.10174        | 0.49581        | 99.40245         |
|                     | 10                          | 60              | 0.0004439                        | 0.0036478                        | 0.3709083                          | 816    | 0.11838        | 0.97274        | 98.90888         |
|                     | 15                          | 60              | 0.0007905                        | 0.0031042                        | 0.5178868                          | 752    | 0.15174        | 0.59581        | 99.25245         |
|                     | 20                          | 60              | 0.0006267                        | 0.0030542                        | 0.6123191                          | 665    | 0.10174        | 0.49581        | 99.40245         |
|                     | 20                          | 50              | 0.0023563                        | 0.0035645                        | 0.4929352                          | 339    | 0.46384        | 0.70167        | 98.83449         |
|                     | 20                          | 40              | 0.0002312                        | 0.0029195                        | 0.1838492                          | 233    | 0.12365        | 1.56124        | 98.31511         |
|                     | 20                          | 30              | 0.0002016                        | 0.0008115                        | 0.0589869                          | 233    | 0.33604        | 1.35242        | 98.31154         |
| 700                 | 5                           | 60              | 0.0000318                        | 0.0000078                        | 0.5851509                          | 280631 | 0.00544        | 0.00133        | 99.99323         |
|                     | 10                          | 60              | 0.0000264                        | 0.0000163                        | 0.8128259                          | 171420 | 0.00325        | 0.00200        | 99.99475         |
|                     | 15                          | 60              | 0.0000244                        | 0.0000080                        | 0.8369432                          | 146042 | 0.00292        | 0.00096        | 99.99612         |
|                     | 20                          | 60              | 0.0000212                        | -                                | 1.0489788                          | 158726 | 0.00202        | <0.0005        | 99.99748         |
|                     | 20                          | 50              | 0.0000242                        | -                                | 0.8030074                          | 113956 | 0.00301        | <0.0005        | 99.99649         |
|                     | 20                          | 40              | 0.0000240                        | -                                | 0.5956300                          | 88492  | 0.00402        | <0.0005        | 99.99548         |
|                     | 20                          | 30              | 0.0000210                        | -                                | 0.3016233                          | 53472  | 0.00698        | <0.0005        | 99.99252         |
| 750                 | 5                           | 60              | 0.0000335                        | 0.0000055                        | 0.4094637                          | 199351 | 0.00819        | 0.00134        | 99.99047         |
|                     | 10                          | 60              | 0.0000393                        | 0.0000098                        | 0.6729400                          | 123110 | 0.00585        | 0.00146        | 99.99269         |
|                     | 15                          | 60              | 0.0000367                        | 0.0000086                        | 0.7439495                          | 93043  | 0.00494        | 0.00115        | 99.99391         |
|                     | 20                          | 60              | 0.0000247                        | -                                | 0.7529838                          | 91112  | 0.00389        | <0.0005        | 99.99561         |
|                     | 20                          | 50              | 0.0000340                        | -                                | 0.6691679                          | 71681  | 0.00508        | <0.0005        | 99.99442         |
|                     | 20                          | 40              | 0.0000197                        | -                                | 0.3103751                          | 58305  | 0.00636        | <0.0005        | 99.99314         |
|                     | 20                          | 30              | 0.0000371                        | -                                | 0.2416600                          | 25249  | 0.01534        | <0.0005        | 99.98416         |
| 800                 | 5                           | 60              | 0.0000288                        | 0.0000116                        | 0.3752614                          | 176397 | 0.00768        | 0.00309        | 99.98923         |
|                     | 10                          | 60              | 0.0000323                        | 0.0000115                        | 0.4609562                          | 94728  | 0.00701        | 0.00249        | 99.99050         |
|                     | 15                          | 60              | 0.0000261                        | 0.0000065                        | 0.5159650                          | 89799  | 0.00505        | 0.00126        | 99.99369         |
|                     | 20                          | 60              | 0.0000196                        | -                                | 0.5309564                          | 86576  | 0.00412        | <0.0005        | 99.99538         |
|                     | 20                          | 50              | 0.0000257                        | -                                | 0.4749534                          | 67678  | 0.00541        | <0.0005        | 99.99409         |
|                     | 20                          | 40              | 0.0000168                        | -                                | 0.2119811                          | 47558  | 0.00791        | <0.0005        | 99.99159         |
|                     | 20                          | 30              | 0.0000246                        | -                                | 0.1571360                          | 24795  | 0.01563        | <0.0005        | 99.98387         |

**S16** Dehydration performance of various membranes reported in other literature for a water/IPA binary mixture

| Category                                    | Membrane materials                                                     | Feed Con.% H <sub>2</sub> O | Feed temp. (°C) | Total flux (g/m <sup>2</sup> .hr) | Separation factor ( $\alpha$ ) | Ref. |
|---------------------------------------------|------------------------------------------------------------------------|-----------------------------|-----------------|-----------------------------------|--------------------------------|------|
| Polymers                                    | PBI (modified with chitosan)                                           | 70                          | 25              | 247                               | 21                             | 33   |
|                                             | PBOZ (Poly (benz-3,1-oxazinone-4))                                     | 10                          | 50              | 3                                 | 9000                           | 34   |
|                                             | PVA-APTEOS blend (cross-linked with TEOS)                              | 10                          | 30              | 60                                | 891                            | 35   |
|                                             | PVA (cross-linked with 4-Sulfophthalic acid)                           | 10                          | 40              | 46                                | 2638                           | 36   |
|                                             | CMS-3(Commercialized dense membrane) supported on Electrospun PTFE     | 12.4                        | 70              | 111                               | 81                             | 37   |
|                                             | PBO (Polybenzoxazole)                                                  | 10                          | 80              | 135                               | 140                            | 38   |
|                                             | PVA-PVAm blend (cross-linked with Glutaraldehyde)                      | 15                          | 60              | 160                               | 2085                           | 39   |
|                                             | Chitosan (cross-linked with Glutaraldehyde and Maleic anhydride)       | 10                          | 60              | 300                               | 634                            | 40   |
|                                             | PVA (cross-linked with TMC)                                            | 10                          | 60              | 320                               | 400                            | 41   |
|                                             | PVA-Na Alginate blend (cross-linked with Glutaraldehyde)               | 10                          | 30              | 24                                | 196                            | 42   |
| MMMs                                        | PVA-Na Alginate blend (cross-linked with Maleic acid) supported on PSf | 10                          | 45              | 414                               | 1727                           | 43   |
|                                             | Alginate (RGO as filler) supported on PES                              | 30                          | 25              | 1700                              | 23000                          | 44   |
|                                             | PVA/Glutaraldehyde (GOQD as filler) supported on PSf                   | 30                          | 25              | 464                               | 464                            | 45   |
|                                             |                                                                        | 30                          | 70              | 1800                              | 120                            |      |
|                                             | PVA-PVAm blend/Glutaraldehyde (modified HNT as filler)                 | 10                          | 40              | 31                                | 93313                          | 46   |
|                                             | PVA/PAA (Ag exchanged NaY zeolite as filler)                           | 20                          | 60              | 150                               | 1100                           | 47   |
|                                             |                                                                        | 20                          | 40              | 84                                | 2718                           |      |
|                                             | P84_SPES Primer (30wt.% ZIF-90 as filler)                              | 15                          | 60              | 109                               | 5668                           | 48   |
|                                             | (MWNT modified with PSS) supported on PAN                              | 10                          | 30              | 168                               | 882                            | 49   |
|                                             | PVA/Glutaraldehyde (5wt.% ZIF-8 as filler)                             | 10                          | 30              | 868                               | 132                            | 50   |
| PVA/Glutaraldehyde (CNT as filler)          | 10                                                                     | 30                          | 96              | 79                                | 51                             |      |
| Matrimid ( $\beta$ -cyclodextrin as filler) | 14                                                                     | 22                          | 52              | 5000                              | 52                             |      |
| PBI                                         | PBI                                                                    | 15                          | 60              | 9                                 | 5000                           | 53   |
|                                             | PBI (ZIF-8 as filler)                                                  | 15                          | 60              | 86                                | 3417                           |      |
| TFCs                                        | MPD-TMC supported on alumina tube                                      | 15                          | 80              | 6050                              | 1396                           | 54   |
|                                             | Chitosan-TMC supported on alumina tube                                 | 10                          | 60              | 640                               | 9634                           | 55   |

|          |                                                                                   |      |    |      |        |           |
|----------|-----------------------------------------------------------------------------------|------|----|------|--------|-----------|
|          |                                                                                   | 10   | 70 | 908  | 8993   |           |
|          | DAPE-TMC with TiO <sub>2</sub> interlayer supported on alumina tube               | 10   | 60 | 6440 | 12000  | 56        |
|          | HPEI-TMC supported on Torolon                                                     | 15   | 50 | 1282 | 624    | 57        |
|          | Ti <sub>2</sub> CT <sub>x</sub> Mxene (functionalized with PDDA) supported on PAN | 10   | 50 | 1237 | 1932   | 58        |
|          | Vacuum assisted grown NaA Zeolite                                                 | 05   | 70 | 1670 | 10000  | 59        |
|          | A-type Zeolite (Mitsui)                                                           | 10.4 | 75 | 1580 | 30000  |           |
|          | T-type Zeolite (Mitsui)                                                           | 10.2 | 75 | 2100 | 9000   | 60        |
|          | ECN Silica                                                                        | 10.2 | 75 | 2760 | 90     |           |
|          | Silica                                                                            |      | 80 | 650  | 75     |           |
| Ceramics | Silica with 10mol.% Zirconium                                                     | N/A  | 80 | 860  | 300    | 61        |
|          | Silica with 10mol.% Titanium                                                      |      | 80 | 780  | 400    |           |
|          | Sulfonated PPO based CMS                                                          | 10   | 70 | 1400 | 99900  |           |
|          | (Carbon molecular Sieve, pyrolysis at 600°C)                                      | 10   | 80 | 2000 | 58100  | 62        |
|          | Resorcinol based CMS (pyrolysis at 400°C)                                         | 10   | 70 | 233  | 10000  | 63        |
|          | Matrimid based CMS (pyrolysis at 700°C) supported on alumina disc                 | 10   | 60 | 1071 | 189000 | This work |
|          |                                                                                   | 20   | 60 | 1785 | 148468 |           |

**S17** Dehydration performance of various membranes reported in other literature for a water/IPA/ECH ternary mixture

| Membrane materials                                                                   | Feed comp. wt.%<br>(ECH/IPA/Water) | Feed temp.<br>(°C) | Total flux<br>(g/m <sup>2</sup> .hr) | Separation<br>factor ( $\alpha$ ) | Ref.         |
|--------------------------------------------------------------------------------------|------------------------------------|--------------------|--------------------------------------|-----------------------------------|--------------|
| PVA cross-linked with Glutaraldehyde                                                 |                                    |                    | 25                                   | 1908                              |              |
| PVA-PVAm blend cross-linked with<br>Glutaraldehyde (PVAm_0.5)                        | 50/30/20                           | 30                 | 110                                  | 149                               | 64           |
| PVA-PVAm blend cross-linked with<br>Glutaraldehyde (PVAm_1.0)                        |                                    |                    | 205                                  | 97                                |              |
| PVA-PVAm blend cross-linked with<br>Glutaraldehyde (PVAm_1.5)                        |                                    |                    | 320                                  | 60                                |              |
| PVA crosslinked with TEOS and PVAm<br>(STA as filler) layer by layer coating (0L-L)  |                                    |                    | 140                                  | 2099                              |              |
| PVA crosslinked with TEOS and PVAm<br>(STA as filler) layer by layer coating (5L-L)  | 50/30/20                           | 30                 | 220                                  | 1061                              |              |
| PVA crosslinked with TEOS and PVAm<br>(STA as filler) layer by layer coating (10L-L) |                                    |                    | 280                                  | 416                               | 65           |
|                                                                                      |                                    | 30                 | 70                                   | 8033                              |              |
| PVA crosslinked with TEOS and PVAm<br>(STA as filler) layer by layer coating (5L-L)  | 50/35/15                           | 40                 | 150                                  | 4617                              |              |
|                                                                                      |                                    | 50                 | 190                                  | 1729                              |              |
|                                                                                      |                                    | 30                 | 285                                  | 53484                             |              |
|                                                                                      | 50/30/20                           | 40                 | 496                                  | 88448                             |              |
|                                                                                      |                                    | 50                 | 869                                  | 113834                            |              |
| Matrimid based CMS (pyrolysis at 700°C)<br>supported on alumina disc                 |                                    | 60                 | 1049                                 | 158692                            | This<br>work |
|                                                                                      | 53.125/31.875/15                   | 60                 | 837                                  | 145995                            |              |
|                                                                                      | 56.25/3.75/10                      | 60                 | 813                                  | 171385                            |              |
|                                                                                      | 58.75/36.25/5                      | 60                 | 585                                  | 280729                            |              |

## References

1. J. Shen, G. Liu, Y. Ji, Q. Liu, L. Cheng, K. Guan, M. Zhang, G. Liu, J. Xiong and J. Yang, *Advanced Functional Materials*, 2018, **28**, 1801511.
2. H. Guo, G. Zhu, I. J. Hewitt and S. Qiu, *Journal of the American Chemical Society*, 2009, **131**, 1646-1647.
3. H. Lin, R. Liu, S. Dangwal, S.-J. Kim, N. Mehra, Y. Li and J. Zhu, *ACS applied materials & interfaces*, 2018, **10**, 28166-28175.
4. H. Chang, Y. Wang, L. Xiang, D. Liu, C. Wang and Y. Pan, *Chemical Engineering Science*, 2018, **192**, 85-93.
5. J. Hou, Y. Wei, S. Zhou, Y. Wang and H. Wang, *Chemical Engineering Science*, 2018, **182**, 180-188.
6. Z. Tang, J. Dong and T. M. Nenoff, *Langmuir*, 2009, **25**, 4848-4852.
7. P. H. T. Ngamou, M. E. Ivanova, O. Guillon and W. A. Meulenber, *Journal of Materials Chemistry A*, 2019, **7**, 7082-7091.
8. W. Wei, G. Qin, H. Hu, L. You and G. Chen, *Journal of Membrane Science*, 2007, **303**, 80-85.
9. S. Roy, R. Das, M. K. Gagrai and S. Sarkar, *Journal of Porous Materials*, 2016, **23**, 1653-1662.
10. H.-H. Tseng, C.-T. Wang, G.-L. Zhuang, P. Uchytíl, J. Reznickova and K. Setnickova, *Journal of Membrane Science*, 2016, **510**, 391-404.
11. H.-H. Tseng, K. Shih, P.-T. Shiu and M.-Y. Wey, *Journal of membrane science*, 2012, **405**, 250-260.
12. B. Ghalei, K. Wakimoto, C. Y. Wu, A. P. Isfahani, T. Yamamoto, K. Sakurai, M. Higuchi, B. K. Chang, S. Kitagawa and E. Sivaniah, *Angewandte Chemie International Edition*, 2019, **58**, 19034-19040.
13. S. Jiang, X. Shi, F. Sun and G. Zhu, *Chemistry—An Asian Journal*, 2020.
14. H. Li, Z. Song, X. Zhang, Y. Huang, S. Li, Y. Mao, H. J. Ploehn, Y. Bao and M. Yu, *Science*, 2013, **342**, 95-98.
15. M. ten Hove, A. Nijmeijer and L. Winnubst, *Separation and purification technology*, 2015, **147**, 372-378.
16. F. Hillman, J. Brito and H.-K. Jeong, *ACS applied materials & interfaces*, 2018, **10**, 5586-5593.
17. M. Weber, M. Drobek, B. Rebière, C. Charmette, J. Cartier, A. Julbe and M. Bechelany,

- Journal of Membrane Science*, 2020, **596**, 117701.
18. H.-H. Tseng and A. K. Itta, *Journal of membrane science*, 2012, **389**, 223-233.
  19. R. Rajagopalan, A. Merritt, A. Tseytlin and H. C. Foley, *Carbon*, 2006, **44**, 2051-2058.
  20. C. Song, T. Wang, X. Wang, J. Qiu and Y. Cao, *Separation and purification technology*, 2008, **58**, 412-418.
  21. F. Zhou, H. N. Tien, W. L. Xu, J.-T. Chen, Q. Liu, E. Hicks, M. Fathizadeh, S. Li and M. Yu, *Nature communications*, 2017, **8**, 1-8.
  22. Y. Wang, L. Li, X. Zhang, J. Li, C. Liu, N. Li and Z. Xie, *Journal of Membrane Science*, 2019, **589**, 117246.
  23. J. Zhu, H. Li, J. Hou, J. Liu, Y. Zhang and B. Van der Bruggen, *AIChE Journal*, 2020, **66**, e16935.
  24. K. Eum, M. Hayashi, M. D. De Mello, F. Xue, H. T. Kwon and M. Tsapatsis, *Angewandte Chemie*, 2019, **131**, 16542-16546.
  25. A. L. Ahmad, Z. A. Jawad, S. C. Low and S. H. S. Zein, *Journal of Membrane Science*, 2014, **451**, 55-66.
  26. S. Li and C. Q. Fan, *Industrial & engineering chemistry research*, 2010, **49**, 4399-4404.
  27. S. R. Venna and M. A. Carreon, *Langmuir*, 2011, **27**, 2888-2894.
  28. D. W. Shin, S. H. Hyun, C. H. Cho and M. H. Han, *Microporous and mesoporous materials*, 2005, **85**, 313-323.
  29. M. P. Bernal, J. Coronas, M. Menendez and J. Santamaria, *AIChE journal*, 2004, **50**, 127-135.
  30. X. Gu, J. Dong and T. M. Nenoff, *Industrial & engineering chemistry research*, 2005, **44**, 937-944.
  31. K. Kusakabe, T. Kuroda, A. Murata and S. Morooka, *Industrial & engineering chemistry research*, 1997, **36**, 649-655.
  32. R. Kumar, C. Zhang, A. K. Itta and W. J. Koros, *Journal of Membrane Science*, 2019, **583**, 9-15.
  33. Y.-J. Han, K.-H. Wang, J.-Y. Lai and Y.-L. Liu, *Journal of Membrane Science*, 2014, **463**, 17-23.
  34. A. Pulyalina, G. Polotskaya, M. Goikhman, I. Podeshvo, L. Kalyuzhnaya, M. Chislov and A. Toikka, *Journal of Applied Polymer Science*, 2013, **130**, 4024-4031.
  35. S. Razavi, A. Sabetghadam and T. Mohammadi, *Chemical Engineering Research and Design*, 2011, **89**, 148-155.



36. P. S. Rachipudi, M. Y. Kariduraganavar, A. A. Kittur and A. M. Sajjan, *Journal of Membrane Science*, 2011, **383**, 224-234.
37. V. Smuleac, J. Wu, S. Nemser, S. Majumdar and D. Bhattacharyya, *Journal of Membrane Science*, 2010, **352**, 41-49.
38. Y. K. Ong, H. Wang and T.-S. Chung, *Chemical Engineering Science*, 2012, **79**, 41-53.
39. S. Chaudhari, Y. Kwon, M. Moon, M. Shon, S. Nam and Y. Park, *Journal of Applied Polymer Science*, 2017, **134**, 45572.
40. W. Zhang, G. Li, Y. Fang and X. Wang, *Journal of Membrane Science*, 2007, **295**, 130-138.
41. S. Xiao, R. Y. M. Huang and X. Feng, *Journal of Membrane Science*, 2006, **286**, 245-254.
42. M. D. Kurkuri, U. S. Toti and T. M. Aminabhavi, *Journal of Applied Polymer Science*, 2002, **86**, 3642-3651.
43. Y. Q. Dong, L. Zhang, J. N. Shen, M. Y. Song and H. L. Chen, *Desalination*, 2006, **193**, 202-210.
44. R. L. G. Lecaros, M. E. Bismonte, B. T. Doma, W.-S. Hung, C.-C. Hu, H.-A. Tsai, S.-H. Huang, K.-R. Lee and J.-Y. Lai, *Carbon*, 2020, **162**, 318-327.
45. R. L. G. Lecaros, K. M. Deseo, W.-S. Hung, L. L. Tayo, C.-C. Hu, Q.-F. An, H.-A. Tsai, K.-R. Lee and J.-Y. Lai, *Journal of Membrane Science*, 2019, **576**, 36-47.
46. S. Chaudhari, M. Baek, Y. Kwon, M. Shon, S. Nam and Y. Park, *Applied Surface Science*, 2019, **493**, 193-201.
47. Y. Kwon, S. Chaudhari, C. Kim, D. Son, J. Park, M. Moon, M. Shon, Y. Park and S. Nam, *RSC Advances*, 2018, **8**, 20669-20678.
48. D. Hua, Y. K. Ong, Y. Wang, T. Yang and T.-S. Chung, *Journal of Membrane Science*, 2014, **453**, 155-167.
49. M. Amirilargani, M. A. Tofighy, T. Mohammadi and B. Sadatnia, *Industrial & Engineering Chemistry Research*, 2014, **53**, 12819-12829.
50. M. Amirilargani and B. Sadatnia, *Journal of Membrane Science*, 2014, **469**, 1-10.
51. Y. Shirazi, M. A. Tofighy and T. Mohammadi, *Journal of Membrane Science*, 2011, **378**, 551-561.
52. L. Y. Jiang and T. S. Chung, *Journal of Membrane Science*, 2009, **327**, 216-225.
53. G. M. Shi, T. Yang and T. S. Chung, *Journal of Membrane Science*, 2012, **415-416**, 577-586.

54. G. M. Shi and T.-S. Chung, *Journal of Membrane Science*, 2013, **448**, 34-43.
55. X. Zhang, M.-P. Li, Z.-H. Huang, H. Zhang, W.-L. Liu, X.-R. Xu, X.-H. Ma and Z.-L. Xu, *Separation and Purification Technology*, 2020, **234**, 116116.
56. X.-W. Liu, Y. Cao, Y.-X. Li, Z.-L. Xu, Z. Li, M. Wang and X.-H. Ma, *Journal of Membrane Science*, 2019, **576**, 26-35.
57. J. Zuo, Y. Wang, S. P. Sun and T.-S. Chung, *Journal of Membrane Science*, 2012, **405-406**, 123-133.
58. G. Liu, S. Liu, K. Ma, H. Wang, X. Wang, G. Liu and W. Jin, *Industrial & Engineering Chemistry Research*, 2020, **59**, 4732-4741.
59. A. Huang, Y. S. Lin and W. Yang, *Journal of Membrane Science*, 2004, **245**, 41-51.
60. S. Sommer and T. Melin, *Chemical Engineering and Processing: Process Intensification*, 2005, **44**, 1138-1156.
61. J. Sekulić, M. W. J. Luiten, J. E. ten Elshof, N. E. Benes and K. Keizer, *Desalination*, 2002, **148**, 19-23.
62. M. Yoshimune, K. Mizoguchi and K. Haraya, *Journal of Membrane Science*, 2013, **425-426**, 149-155.
63. S. Tanaka, T. Yasuda, Y. Katayama and Y. Miyake, *Journal of Membrane Science*, 2011, **379**, 52-59.
64. S. Chaudhari, Y. Kwon, M. Shon, S. Nam and Y. Park, *RSC Advances*, 2019, **9**, 5908-5917.
65. S. Chaudhari, Y. Kwon, M. Shon, S. Nam and Y. Park, *Journal of Industrial and Engineering Chemistry*, 2020, **81**, 185-195.
